# Supplementary material for: Deconvolution of in vivo protein-RNA contacts using fractionated eCLIP-seq
Source: PubMed Central journal article supplement — STAR Protoc. 2022 Nov 16;3(4):101823. doi: 10.1016/j.xpro.2022.101823 (PMC9676202; doi:10.1016/j.xpro.2022.101823), 2022-11-16
Supplement: mmc1.pdf [file mmc1.pdf]

**Figure S1 related to Figure 1. Autoradiographic visualization showing non-crosslinked control vs crosslinked sample.** The representative U2AF1 eCLIP-seq negative control, obtained from non-crosslinked U2AF1 S34F cells, is characterized by a faint, almost absent, RNA signal in comparison to the RNA signal in crosslinked U2AF1 S34F cells.

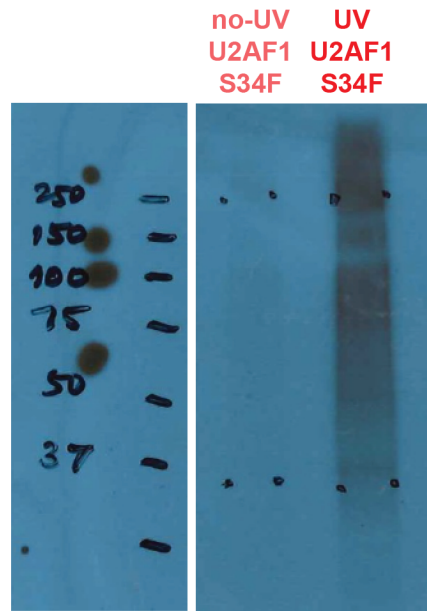

**Table S1 related to Step 21. Illumina Pooling Guidelines.**

**Pooling Guidelines for 8-Plex Combinations**

| 1    |      | 2    |      | 3    |      | 4    |      | 5    |      | 6    |      |
|------|------|------|------|------|------|------|------|------|------|------|------|
| D501 | D705 | D502 | D706 | D503 | D701 | D505 | D702 | D506 | D704 | D507 | D703 |
| D502 | D704 | D501 | D702 | D505 | D703 | D503 | D706 | D507 | D705 | D506 | D701 |
| D503 | D703 | D505 | D705 | D506 | D706 | D507 | D701 | D504 | D702 | D508 | D704 |
| D505 | D701 | D503 | D704 | D507 | D702 | D506 | D703 | D508 | D706 | D504 | D705 |
| D506 | D710 | D507 | D712 | D504 | D707 | D508 | D708 | D501 | D709 | D502 | D711 |
| D507 | D709 | D506 | D708 | D508 | D711 | D504 | D712 | D502 | D710 | D501 | D707 |
| D504 | D711 | D508 | D710 | D501 | D712 | D502 | D707 | D503 | D708 | D505 | D709 |
| D508 | D707 | D504 | D709 | D502 | D708 | D501 | D711 | D505 | D712 | D503 | D710 |
| 7    |      | 8    |      | 9    |      | 10   |      | 11   |      | 12   |      |
| D501 | D710 | D502 | D712 | D503 | D707 | D505 | D708 | D506 | D709 | D507 | D711 |
| D502 | D709 | D501 | D708 | D505 | D711 | D503 | D712 | D507 | D710 | D506 | D707 |
| D503 | D711 | D505 | D710 | D506 | D712 | D507 | D707 | D504 | D708 | D508 | D709 |
| D505 | D707 | D503 | D709 | D507 | D708 | D506 | D711 | D508 | D712 | D504 | D710 |
| D506 | D705 | D507 | D706 | D504 | D701 | D508 | D702 | D501 | D704 | D502 | D703 |
| D507 | D704 | D506 | D702 | D508 | D703 | D504 | D706 | D502 | D705 | D501 | D701 |
| D504 | D703 | D508 | D705 | D501 | D706 | D502 | D701 | D503 | D702 | D505 | D704 |
| D508 | D701 | D504 | D704 | D502 | D702 | D501 | D703 | D505 | D706 | D503 | D705 |

**Pooling Guidelines for 6-Plex Combinations**

| 1    |      | 2    |      | 3    |      | 4    |      | 5    |      | 6    |      | 7    |      | 8    |      |
|------|------|------|------|------|------|------|------|------|------|------|------|------|------|------|------|
| D501 | D705 | D501 | D710 | D502 | D704 | D502 | D709 | D503 | D703 | D503 | D711 | D505 | D701 | D505 | D707 |
| D502 | D706 | D502 | D712 | D501 | D702 | D501 | D708 | D505 | D705 | D505 | D710 | D503 | D704 | D503 | D709 |
| D503 | D701 | D503 | D707 | D505 | D703 | D505 | D711 | D506 | D706 | D506 | D712 | D507 | D702 | D507 | D708 |
| D505 | D702 | D505 | D708 | D503 | D706 | D503 | D712 | D507 | D701 | D507 | D707 | D506 | D703 | D506 | D711 |
| D506 | D704 | D506 | D709 | D507 | D705 | D507 | D710 | D504 | D702 | D504 | D708 | D508 | D706 | D508 | D712 |
| D507 | D703 | D507 | D711 | D506 | D701 | D506 | D707 | D508 | D704 | D508 | D709 | D504 | D705 | D504 | D710 |
| 9    |      | 10   |      | 11   |      | 12   |      | 13   |      | 14   |      | 15   |      | 16   |      |
| D506 | D710 | D506 | D705 | D507 | D709 | D507 | D704 | D504 | D711 | D504 | D703 | D508 | D707 | D508 | D701 |
| D507 | D712 | D507 | D706 | D506 | D708 | D506 | D702 | D508 | D710 | D508 | D705 | D504 | D709 | D504 | D704 |
| D504 | D707 | D504 | D701 | D508 | D711 | D508 | D703 | D501 | D712 | D501 | D706 | D502 | D708 | D502 | D702 |
| D508 | D708 | D508 | D702 | D504 | D712 | D504 | D706 | D502 | D707 | D502 | D701 | D501 | D711 | D501 | D703 |
| D501 | D709 | D501 | D704 | D502 | D710 | D502 | D705 | D503 | D708 | D503 | D702 | D505 | D712 | D505 | D706 |
| D502 | D711 | D502 | D703 | D501 | D707 | D501 | D701 | D505 | D709 | D505 | D704 | D503 | D710 | D503 | D705 |

**Table S2 related to Pre-processing of next-generation sequencing data. 3' RNA linker sequences.**

|                                                   |
|---------------------------------------------------|
| >X1A_linker<br>ATATAGGNNNNNAGATCGGAAGAGCGTCGTGTAG |
| >X1B_linker<br>AATAGCANNNNNAGATCGGAAGAGCGTCGTGTAG |
| >X2A_linker<br>AAGTATANNNNNAGATCGGAAGAGCGTCGTGTAG |
| >X2B_linker<br>AGAAGATNNNNNAGATCGGAAGAGCGTCGTGTAG |
| >RiL19_linker_input<br>AGATCGGAAGAGCGTCGTG        |

**Table S3 related to Pre-processing of next-generation sequencing data. Sequencing metrics of U2AF1 freCLIP-seq and Ago2 eCLIP-seq.**

| Sample           | Raw reads | Deduplicated reads | Duplicates% | Post-trimming reads | Post-trimming reads % | Unique-mapped reads | Multi-mapped reads | Total-mapped reads | Mapping % | Average mapping length |
|------------------|-----------|--------------------|-------------|---------------------|-----------------------|---------------------|--------------------|--------------------|-----------|------------------------|
| U2AF1_WT_heavy_1 | 87045558  | 47552328           | 45.37%      | 46912474            | 98.65%                | 29967676            | 10265306           | 40232982           | 85.76%    | 62                     |
| U2AF1_WT_heavy_2 | 81620509  | 43373037           | 46.86%      | 42700777            | 98.45%                | 25925359            | 9340502            | 35265861           | 82.59%    | 56                     |
| U2AF1_WT_light_1 | 105709524 | 28975384           | 72.59%      | 28171271            | 97.22%                | 12220951            | 10186492           | 22407443           | 79.54%    | 49                     |
| U2AF1_WT_light_2 | 87500617  | 16315206           | 81.35%      | 15656052            | 95.96%                | 6326571             | 5920149            | 12246720           | 78.22%    | 55                     |
| Ago2_rep1        | 82698837  | 37723336           | 54.38%      | 36769823            | 97.47%                | 9442408             | 4586541            | 14028949           | 38.15%    | 70                     |
| Ago2_rep2        | 51389385  | 28419922           | 44.70%      | 27911154            | 98.21%                | 6224739             | 2790042            | 9014781            | 32.30%    | 73                     |
